# Supplementary material for: Co-development of an evidence-based personalised smoking cessation intervention for use in a lung cancer screening context
Source: Springer Nature journal article supplement (doi:10.1186/s12890-022-02263-w), 2022-12-15
Supplement: MOESM3 [file 12890_2022_2263_MOESM3_ESM.pdf]

Additional File 3. GRIPP short reporting checklist. From: [GRIPP2 reporting checklists: tools to improve reporting of patient and public involvement in research](#)

| <b>Section and topic</b>            | <b>Item</b>                                                                                                                               | <b>Reported on page No</b> |
|-------------------------------------|-------------------------------------------------------------------------------------------------------------------------------------------|----------------------------|
| 1: Aim                              | Report the aim of PPI in the study                                                                                                        | 4-6                        |
| 2: Methods                          | Provide a clear description of the methods used for PPI in the study                                                                      | 8-9                        |
| 3: Study results                    | Outcomes – Report the results of PPI in the study, including both positive and negative outcomes                                          | 9-12                       |
| 4: Discussion and conclusions       | Outcomes – Comment on the extent to which PPI influenced the study overall. Describe positive and negative effects                        | 13-16                      |
| 5: Reflections/critical perspective | Comment critically on the study, reflecting on the things that went well and those that did not, so others can learn from this experience | 15-16                      |
